# Supplementary material
Source: publisher figshare collection journal article supplement (https://gsajournals.figshare.com/ndownloader/files/16979150)
Supplement: Supplementary file 1 [file 16979150]

## Sheet: Sheet1
generation	run id	plate id	treatment	distance (cm)
p	1	2	1	342.652
p	1	2	1	314.108
p	1	2	1	243.718
p	1	2	1	369.866
p	1	2	1	235.432
p	1	2	1	269.634
p	1	2	1	443.99
p	1	2	1	527.463
p	1	2	1	326.525
p	1	2	1	185.057
p	1	2	1	367.957
p	1	2	1	440.962
p	1	2	1	158.796
p	1	2	1	316.056
p	1	2	1	302.182
p	1	2	1	356.784
p	1	2	1	238.011
p	1	2	1	239.677
p	1	2	1	369.793
p	1	2	1	467.449
p	1	2	1	412.171
p	1	2	1	339.262
p	1	2	1	268.079
p	1	2	1	382.998
p	1	2	1	293.885
p	1	2	1	462.735
p	1	2	1	359.512
p	1	2	1	291.775
p	1	2	1	381.826
p	1	2	1	406.717
p	1	2	1	305.244
p	1	2	1	374.793
p	1	2	1	237.306
p	1	2	1	312.083
p	1	2	1	465.651
p	2	2	1	248.535
p	2	2	1	408.611
p	2	2	1	349.209
p	2	2	1	220.543
p	2	2	1	216.084
p	2	2	1	222.816
p	2	2	1	93.4132
p	2	2	1	134.888
p	2	2	1	244.181
p	2	2	1	274.197
p	2	2	1	169.722
p	2	2	1	253.976
p	2	2	1	210.167
p	2	2	1	253.896
p	2	2	1	337.373
p	2	2	1	87.8058
p	2	2	1	402.873
p	2	2	1	392.116
p	2	2	1	268.46
p	2	2	1	274.364
p	2	2	1	132.695
p	2	2	1	441.629
p	2	2	1	411.119
p	2	2	1	297.915
p	2	2	1	335.433
p	2	2	1	444.304
p	2	2	1	423.026
p	2	2	1	205.701
p	2	2	1	444.842
p	2	2	1	389.107
p	2	2	1	538.7
p	2	2	1	498.716
p	2	2	1	341.453
p	2	2	1	387.698
p	1	1	0	388.711
p	1	1	0	163.835
p	1	1	0	299.051
p	1	1	0	274.673
p	1	1	0	80.9911
p	1	1	0	50.5552
p	1	1	0	182.066
p	1	1	0	326.594
p	1	1	0	169.013
p	1	1	0	428.834
p	1	1	0	297.83
p	1	1	0	197.036
p	1	1	0	305.669
p	1	1	0	415.814
p	1	1	0	369.082
p	1	1	0	269.978
p	1	1	0	382.583
p	1	1	0	237.689
p	1	1	0	46.8299
p	1	1	0	324.736
p	1	1	0	177.24
p	1	1	0	209.77
p	1	1	0	343.966
p	1	1	0	476.035
p	1	1	0	167.457
p	1	1	0	420.703
p	1	1	0	305.215
p	1	1	0	352.917
p	1	1	0	457.116
p	1	1	0	245.205
p	1	1	0	243.715
p	1	1	0	356.551
p	1	1	0	336.514
p	1	1	0	494.414
p	1	1	0	369.392
p	1	1	0	433.121
p	2	1	0	164.456
p	2	1	0	360.769
p	2	1	0	106.903
p	2	1	0	241.965
p	2	1	0	330.535
p	2	1	0	192.27
p	2	1	0	271.798
p	2	1	0	21.3781
p	2	1	0	24.0159
p	2	1	0	18.3892
p	2	1	0	331.367
p	2	1	0	214.526
p	2	1	0	493.76
p	2	1	0	129.676
p	2	1	0	299.574
p	2	1	0	110.427
p	2	1	0	362.892
p	2	1	0	157.834
p	2	1	0	88.8289
p	2	1	0	359.071
p	2	1	0	416.457
p	2	1	0	293.473
p	2	1	0	316.886
p	2	1	0	247.59
p	2	1	0	148.442
p	2	1	0	278.296
p	2	1	0	397.691
p	2	1	0	280.924
p	2	1	0	268.005
p	2	1	0	335.075
p	2	1	0	445.261
p	2	1	0	227.87
p	2	1	0	349.91
p	2	1	0	155.648
p	2	1	0	168.875
p	2	1	0	190.02
F1	1	1	1	451.044
F1	1	1	1	504.173
F1	1	1	1	356.644
F1	1	1	1	263.387
F1	1	1	1	489.763
F1	1	1	1	568.511
F1	1	1	1	298.485
F1	1	1	1	514.977
F1	1	2	1	710.633
F1	1	2	1	568.242
F1	1	2	1	758.359
F1	1	2	1	690.384
F1	1	2	1	602.743
F1	1	2	1	489.952
F1	1	2	1	352.642
F1	1	2	1	655.156
F1	1	3	1	366.001
F1	1	3	1	215.483
F1	1	3	1	607.247
F1	1	3	1	489.204
F1	1	3	1	202.552
F1	1	3	1	515.868
F1	1	3	1	375.407
F1	1	4	1	448.964
F1	1	4	1	476.576
F1	1	4	1	521.663
F1	1	4	1	163.295
F1	1	4	1	474.093
F1	1	4	1	341.163
F1	1	4	1	458.312
F1	1	4	1	335.91
F1	1	5	1	629.901
F1	1	5	1	539.007
F1	1	5	1	184.925
F1	1	5	1	446.822
F1	1	5	1	332.276
F1	1	5	1	489.301
F1	1	5	1	409.842
F1	1	5	1	448.825
F1	1	5	1	324.76
F1	1	6	1	594.44
F1	1	6	1	563.593
F1	1	6	1	436.041
F1	1	6	1	425.392
F1	1	6	1	321.141
F1	1	6	1	358.492
F1	1	6	1	458.921
F1	1	6	1	394.665
F1	1	6	1	518.602
F1	1	7	1	733.004
F1	1	7	1	140.437
F1	1	7	1	452.821
F1	1	7	1	574.988
F1	1	7	1	422.914
F1	1	7	1	528.295
F1	1	7	1	509.289
F1	1	7	1	539.139
F1	1	7	1	387.995
F1	1	8	1	289.67
F1	1	8	1	557.832
F1	1	8	1	545.929
F1	1	8	1	247.966
F1	1	8	1	670.295
F1	1	1	0	69.5847
F1	1	1	0	385.683
F1	1	1	0	539.814
F1	1	1	0	389.322
F1	1	1	0	462.887
F1	1	1	0	432.675
F1	1	1	0	308.748
F1	1	1	0	412.324
F1	1	2	0	76.5906
F1	1	2	0	533.988
F1	1	2	0	413.041
F1	1	2	0	352.719
F1	1	2	0	339.499
F1	1	2	0	239.724
F1	1	2	0	188.71
F1	1	2	0	465.198
F1	1	2	0	544.933
F1	1	3	0	349.184
F1	1	3	0	305.008
F1	1	3	0	461.832
F1	1	3	0	259.84
F1	1	3	0	380.406
F1	1	3	0	428.055
F1	1	3	0	621.111
F1	1	3	0	582.944
F1	1	3	0	586.649
F1	1	4	0	612.431
F1	1	4	0	553.227
F1	1	4	0	453.176
F1	1	4	0	125.23
F1	1	4	0	518.132
F1	1	4	0	407.323
F1	1	4	0	549.847
F1	1	4	0	504.185
F1	1	4	0	363.74
F1	1	5	0	567.008
F1	1	5	0	532.499
F1	1	5	0	413.177
F1	1	5	0	398.798
F1	1	5	0	167.078
F1	1	5	0	346.363
F1	1	5	0	362.995
F1	1	5	0	375.461
F1	1	6	0	421.437
F1	1	6	0	515.859
F1	1	6	0	523.139
F1	1	6	0	358.124
F1	1	6	0	589.002
F1	1	6	0	429.972
F1	1	6	0	490.226
F1	1	6	0	311.667
F1	1	7	0	537.676
F1	1	7	0	141.714
F1	1	7	0	464.388
F1	1	7	0	304.563
F1	1	7	0	483.835
F1	1	7	0	516.101
F1	1	7	0	531.578
F1	1	7	0	283.436
F1	1	8	0	189.706
F1	1	8	0	241.286
F1	1	8	0	238.788
F1	1	8	0	523.688
F1	1	8	0	248.272
F1	1	8	0	265.385
F1	1	8	0	245.07
F1	1	8	0	77.7982
F1	1	8	0	334.928
F1	1	1	F0	592.191
F1	1	1	F0	185.433
F1	1	1	F0	493.367
F1	1	1	F0	380.933
F1	1	1	F0	574.683
F1	1	1	F0	522.426
F1	1	1	F0	539.105
F1	1	2	F0	627.1
F1	1	2	F0	401.522
F1	1	2	F0	404.113
F1	1	2	F0	389.028
F1	1	2	F0	279.981
F1	1	2	F0	422.449
F1	1	2	F0	295.066
F1	1	2	F0	587.661
F1	1	3	F0	465.711
F1	1	3	F0	281.463
F1	1	3	F0	476.703
F1	1	3	F0	437.963
F1	1	3	F0	450.584
F1	1	3	F0	613.212
F1	1	3	F0	593.34
F1	1	3	F0	324.44
F1	1	4	F0	645.043
F1	1	4	F0	501.996
F1	1	4	F0	452.623
F1	1	4	F0	556.189
F1	1	4	F0	499.797
F1	1	4	F0	306.759
F1	1	4	F0	472.811
F1	1	5	F0	633.065
F1	1	5	F0	462.716
F1	1	5	F0	449.588
F1	1	5	F0	647.243
F1	1	5	F0	618.56
F1	1	5	F0	611.484
F1	1	5	F0	467.117
F1	1	5	F0	272.303
F1	1	6	F0	520.505
F1	1	6	F0	377.61
F1	1	6	F0	417.15
F1	1	6	F0	476.647
F1	1	6	F0	400.588
F1	1	6	F0	350.737
F1	1	6	F0	523.082
F1	1	6	F0	378.57
F1	1	7	F0	466.183
F1	1	7	F0	173.613
F1	1	7	F0	533.597
F1	1	7	F0	536.026
F1	1	7	F0	380.175
F1	1	7	F0	466.628
F1	1	8	F0	527.402
F1	1	8	F0	614.774
F1	1	8	F0	526.273
F1	1	8	F0	205.939
F1	1	8	F0	462.614
F1	1	8	F0	236.808
F1	1	8	F0	583.592
F1	1	8	F0	356.923
F1	1	8	F0	158.057
F1	1	1	M0	480.975
F1	1	1	M0	594.268
F1	1	1	M0	527.662
F1	1	1	M0	546.466
F1	1	1	M0	552.604
F1	1	1	M0	528.044
F1	1	1	M0	527.507
F1	1	1	M0	602.09
F1	1	1	M0	430.039
F1	1	2	M0	567.347
F1	1	2	M0	547.894
F1	1	2	M0	309.919
F1	1	2	M0	266.435
F1	1	2	M0	471.297
F1	1	2	M0	441.335
F1	1	2	M0	376.171
F1	1	3	M0	359.652
F1	1	3	M0	301.749
F1	1	3	M0	573.661
F1	1	3	M0	554.512
F1	1	3	M0	306.35
F1	1	3	M0	608.445
F1	1	3	M0	567.645
F1	1	3	M0	684.478
F1	1	4	M0	528.718
F1	1	4	M0	503.635
F1	1	4	M0	449.113
F1	1	4	M0	412.027
F1	1	4	M0	448.474
F1	1	4	M0	527.501
F1	1	4	M0	262.403
F1	1	4	M0	481.097
F1	1	4	M0	269.198
F1	1	5	M0	516.326
F1	1	5	M0	482.913
F1	1	5	M0	483.825
F1	1	5	M0	404.158
F1	1	5	M0	396.075
F1	1	5	M0	438.177
F1	1	5	M0	383.754
F1	1	6	M0	256.945
F1	1	6	M0	446.031
F1	1	6	M0	361.701
F1	1	6	M0	397.128
F1	1	6	M0	398.611
F1	1	6	M0	388.551
F1	1	6	M0	431.188
F1	1	6	M0	457.239
F1	1	7	M0	570.01
F1	1	7	M0	570.222
F1	1	7	M0	460.08
F1	1	7	M0	486.065
F1	1	7	M0	484.898
F1	1	7	M0	578.098
F1	1	7	M0	366.288
F1	1	8	M0	484.641
F1	1	8	M0	600.432
F1	1	8	M0	680.63
F1	1	8	M0	713.695
F1	1	8	M0	632.638
F1	1	8	M0	673.528
F1	1	8	M0	474.327
F1	1	8	M0	695.87
